# Supplementary figures and images for: Spin Hall effect modulated by an electric field in asymmetric two-dimensional MoSiAs2Se
Source: Royal Society of Chemistry journal article supplement (doi:10.1039/d4cp00594e), 2024-01-01

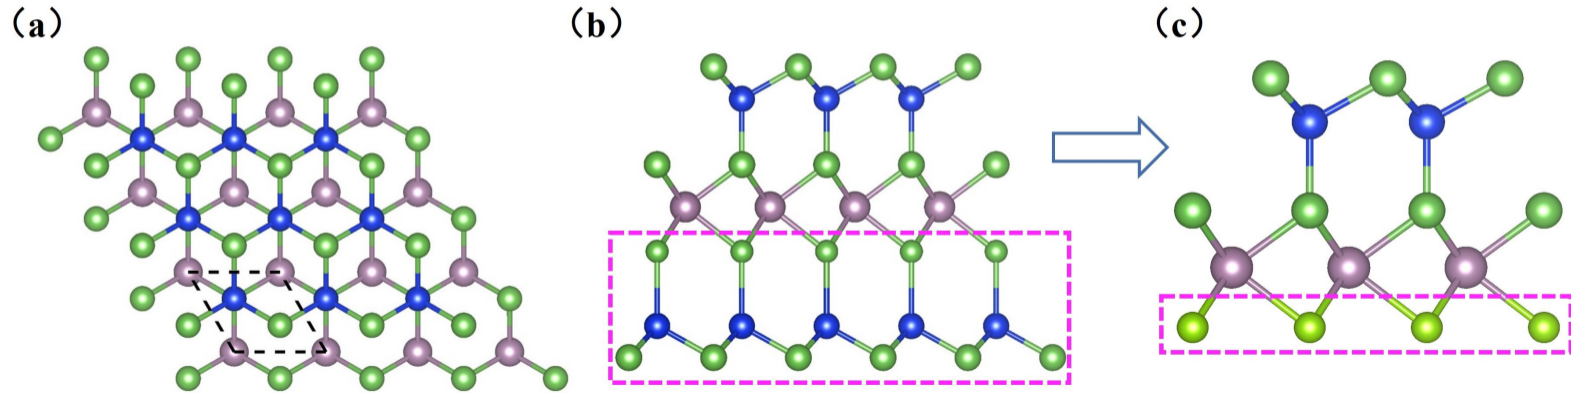

Supplement: d4cp00594e1.pdf [file d4cp00594e1.pdf]

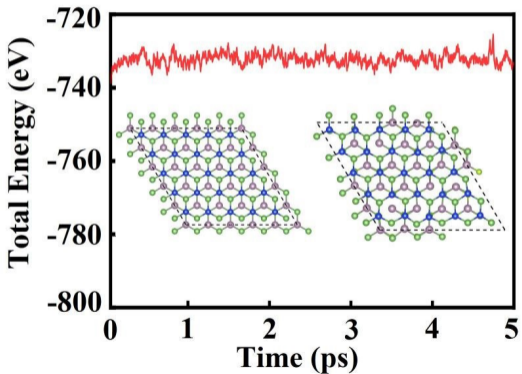

Supplement: d4cp00594e2.pdf [file d4cp00594e2.pdf]

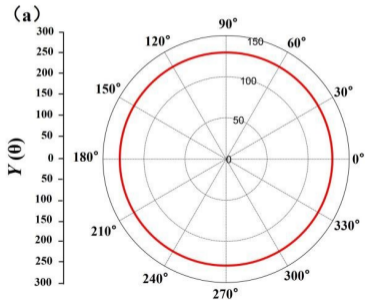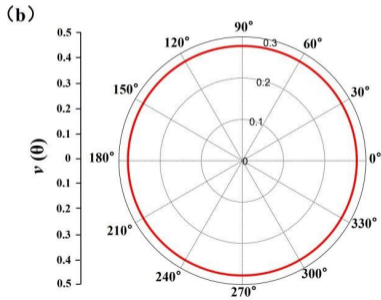

Supplement: d4cp00594e3.pdf [file d4cp00594e3.pdf]

(a)

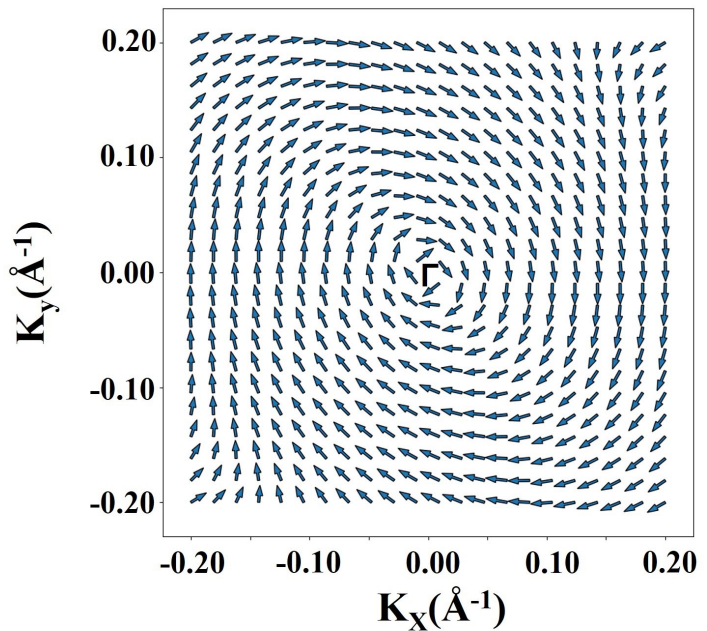

(b)

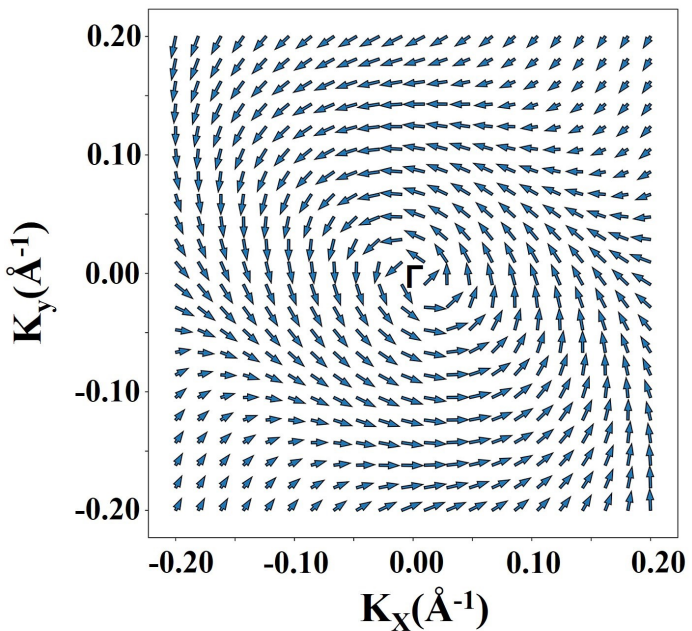

Supplement: d4cp00594e4.pdf [file d4cp00594e4.pdf]

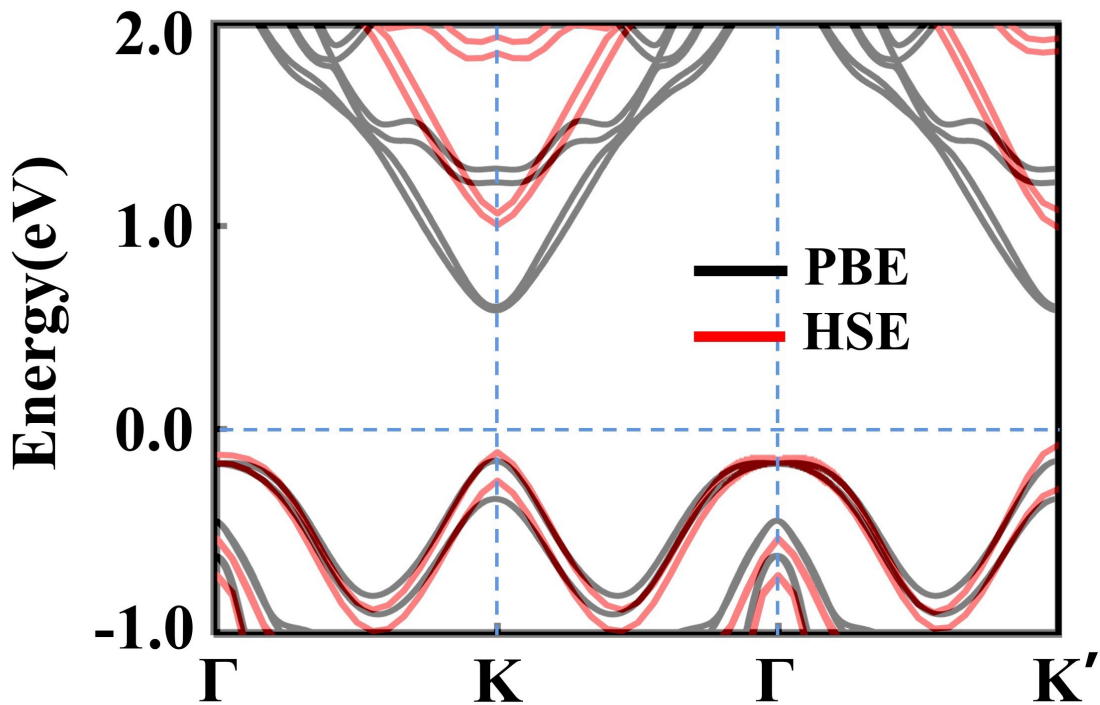

Supplement: d4cp00594e5.pdf [file d4cp00594e5.pdf]

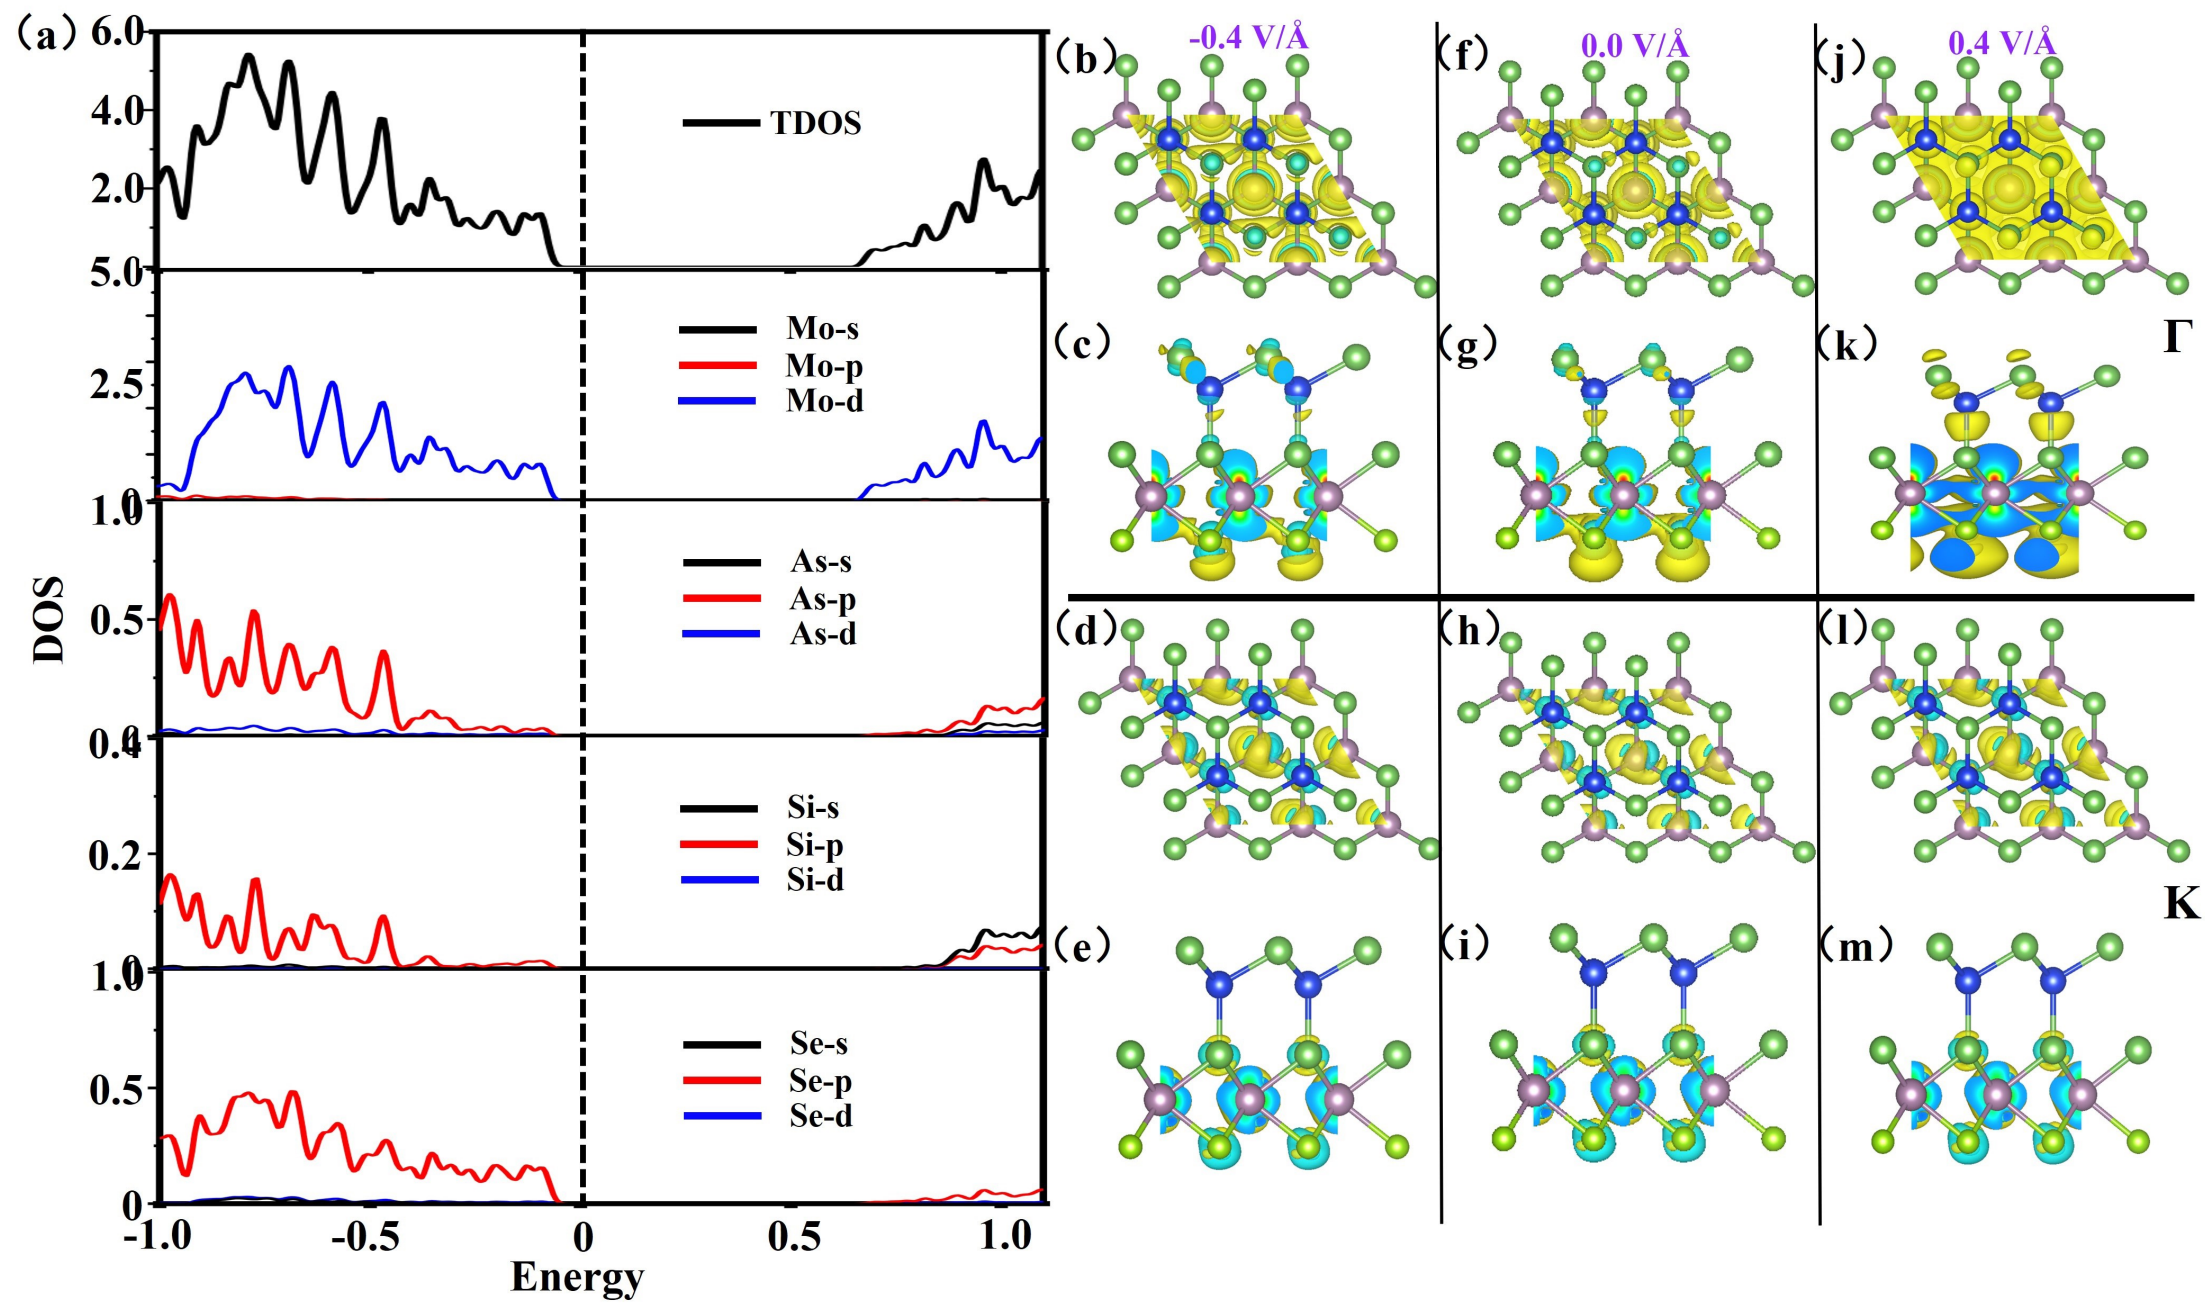

Supplement: d4cp00594e6.pdf [file d4cp00594e6.pdf]

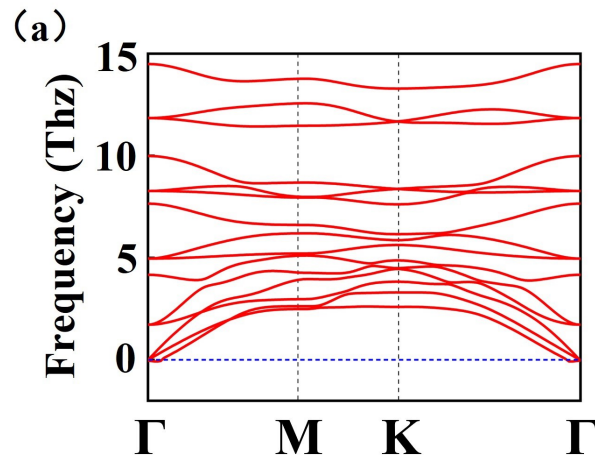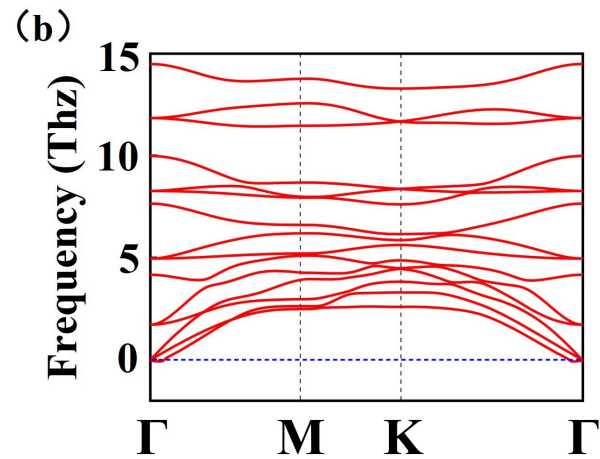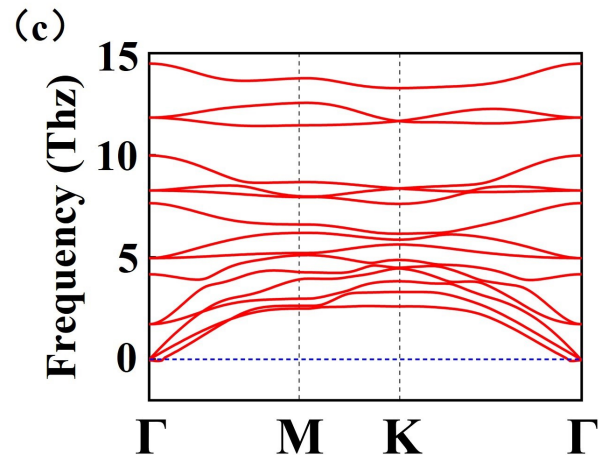

Supplement: d4cp00594e7.pdf [file d4cp00594e7.pdf]

(a)

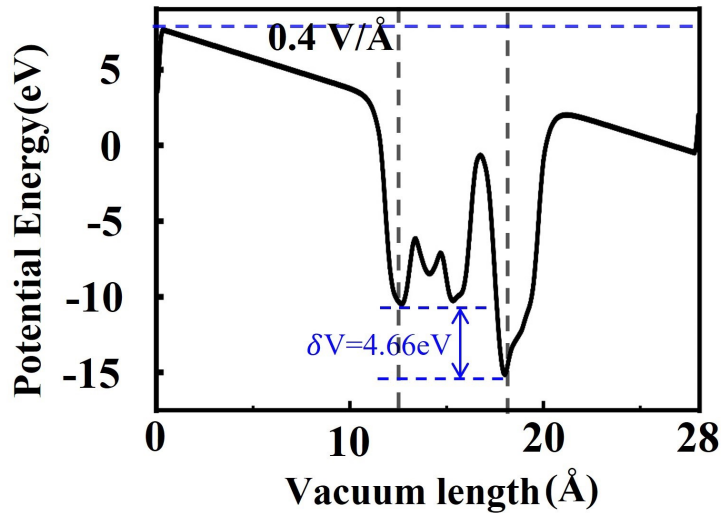

(b)

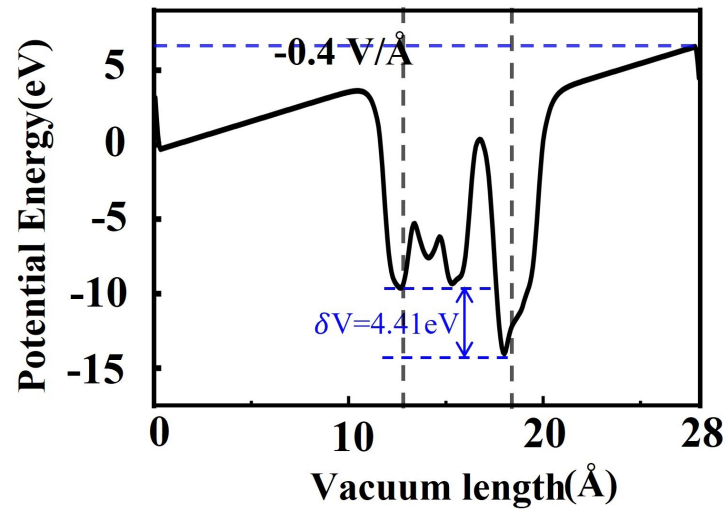

Supplement: d4cp00594e8.pdf [file d4cp00594e8.pdf]

(a)

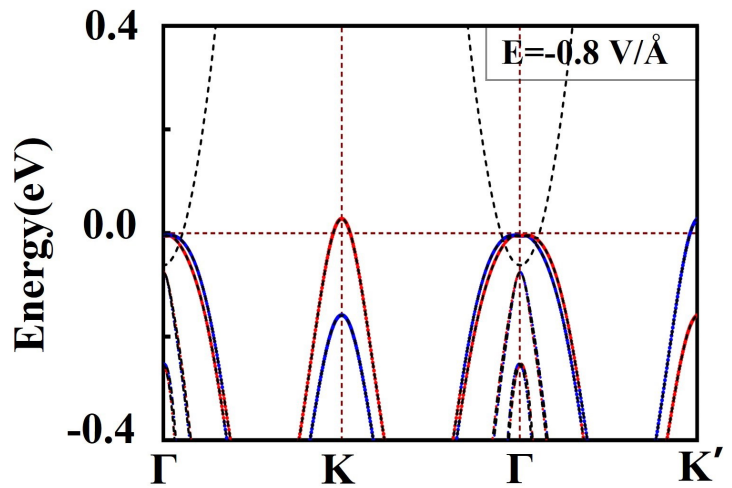

(b)

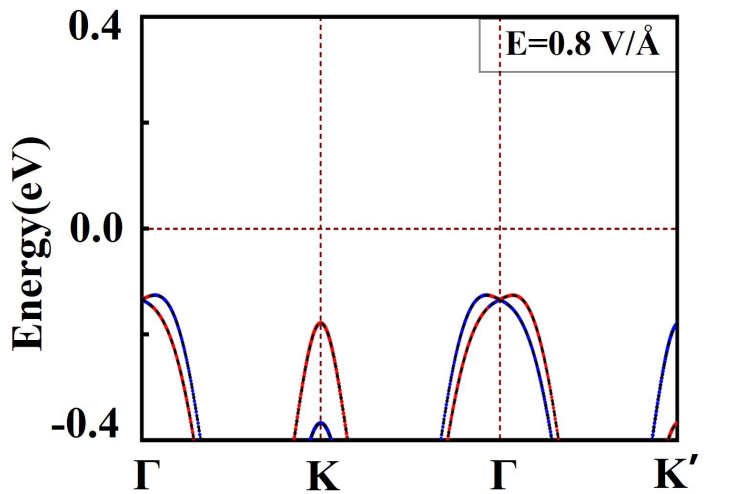

Supplement: d4cp00594e9.pdf [file d4cp00594e9.pdf]
